# Supplementary material for: The Fear Reduction Exercised Early (FREE) approach to low back pain: study protocol for a randomised controlled trial
Source: Springer Nature journal article supplement (doi:10.1186/s13063-017-2225-8), 2017-10-17
Supplement: MOESM2 [file 15141112]

## Additional file 2. GP behaviour change goals, techniques and assessment

These techniques are described using the behaviour change technique taxonomy developed by Michie et al. [1].

| GOAL                                                      | BEHAVIOUR CHANGE TECHNIQUE*[1]                                                                                              | MODE OF DELIVERY                                                                                                                                                                 | MEASURE                                                                                                                                                                 | MEASUREMENT TOOL                                                                                                                                                                                                     |
|-----------------------------------------------------------|-----------------------------------------------------------------------------------------------------------------------------|----------------------------------------------------------------------------------------------------------------------------------------------------------------------------------|-------------------------------------------------------------------------------------------------------------------------------------------------------------------------|----------------------------------------------------------------------------------------------------------------------------------------------------------------------------------------------------------------------|
| Practice the approach enough to become confident          | <u>2) Reward and threat</u> <ul style="list-style-type: none"> <li>Incentive</li> </ul>                                     | GP receives a \$20 voucher for each of the first three times they use the approach                                                                                               | <ul style="list-style-type: none"> <li>GP claims of vouchers</li> <li>Confidence in ability to use the approach</li> <li>Confidence in ability to manage LBP</li> </ul> | <ul style="list-style-type: none"> <li>Count</li> <li>(GP interviews implementation study)</li> <li>Confidence to manage LBP</li> </ul>                                                                              |
| Use of FREE becomes normal                                | <u>3) Repetition and substitution</u> <ul style="list-style-type: none"> <li>Habit formation</li> </ul>                     | Encouraged to use with all LBP patients                                                                                                                                          | <ul style="list-style-type: none"> <li>Proportion LBP patients with whom the approach is used</li> </ul>                                                                | <ul style="list-style-type: none"> <li>Count</li> </ul>                                                                                                                                                              |
| FREE is easy to use                                       | <u>4) Antecedents</u> <ul style="list-style-type: none"> <li>Restructuring the physical environment</li> </ul>              | <ul style="list-style-type: none"> <li>Medtech advanced form with prompts and guidance</li> <li>Training booklet with diagrams for providing explanations to patients</li> </ul> | <ul style="list-style-type: none"> <li>Number of times the approach is used</li> <li>Patient receives explanation</li> </ul>                                            | <ul style="list-style-type: none"> <li>Count</li> <li>Patient report</li> <li>Audio recordings of consult</li> </ul>                                                                                                 |
| Decreased anxiety about pathology and decreased screening | <u>4) Antecedents</u> <ul style="list-style-type: none"> <li>Restructuring the social environment</li> </ul>                | Information about the risk of pathology, risks of screening, sensitivity of flags, influence on outcome                                                                          | <ul style="list-style-type: none"> <li>Red flag questions later in consultation</li> <li>Reduced investigation referral</li> </ul>                                      | <ul style="list-style-type: none"> <li>Audio recordings of consult</li> <li>Notes audit</li> <li>Patient report</li> <li>Otago Costs and Consequences Questionnaire</li> <li>ACC data</li> </ul>                     |
| Increase use of the FREE approach                         | <u>5) Associations</u> <ul style="list-style-type: none"> <li>Prompt</li> </ul>                                             | <ul style="list-style-type: none"> <li>Booklet stand</li> <li>Medtech tool bar icon</li> <li>Medtech advanced form</li> </ul>                                                    | <ul style="list-style-type: none"> <li>Number of times the approach is used</li> </ul>                                                                                  | <ul style="list-style-type: none"> <li>Count</li> </ul>                                                                                                                                                              |
| Increased consideration of psychosocial factors           | <u>7) Natural consequences</u> <ul style="list-style-type: none"> <li>Health consequences</li> </ul>                        | Education regarding factors which influence outcome                                                                                                                              | <ul style="list-style-type: none"> <li>Psychosocial questioning and integration into explanations</li> </ul>                                                            | <ul style="list-style-type: none"> <li>Audio recordings of consult</li> </ul>                                                                                                                                        |
| Increased activity prescription                           | <u>7) Natural consequences</u> <ul style="list-style-type: none"> <li>Health consequences</li> </ul>                        | Education regarding benefits and safety of exercise                                                                                                                              | <ul style="list-style-type: none"> <li>Decreased concern regarding pain and injury</li> <li>Increased activity recommendation</li> </ul>                                | <ul style="list-style-type: none"> <li>Health Care Providers' Pain And Impairment Relationship Scale</li> <li>Clinical behaviour - vignettes</li> <li>Patient report</li> <li>Audio recordings of consult</li> </ul> |
| Increased confidence in FREE                              | <u>8) Feedback and monitoring</u> <ul style="list-style-type: none"> <li>Self-monitoring of outcome of behaviour</li> </ul> | Record observations of patient responses on notes page of booklet                                                                                                                | <ul style="list-style-type: none"> <li>Confidence in ability to use FREE</li> <li>Confidence in ability to manage back pain</li> </ul>                                  | <ul style="list-style-type: none"> <li>(GP interviews implementation study)</li> <li>Confidence to manage LBP</li> </ul>                                                                                             |

From: Darlow B, Stanley J, Dean S, Abbott JH, Garrett S, Mathieson F, Dowell A (2017). The Fear Reduction Exercised Early (FREE) approach to low back pain: protocol for a cluster randomised, parallel-group, superiority trial of patient impairment 6-months post general practitioner consultation.

| GOAL                                                                             | BEHAVIOUR CHANGE TECHNIQUE*[1]                                      | MODE OF DELIVERY                                                                                                 | MEASURE                                                           | MEASUREMENT TOOL                                                        |
|----------------------------------------------------------------------------------|---------------------------------------------------------------------|------------------------------------------------------------------------------------------------------------------|-------------------------------------------------------------------|-------------------------------------------------------------------------|
|                                                                                  | <u>8) Feedback and monitoring</u><br>• Self-monitoring of behaviour | Tick sheet in booklet for each time uses FREE                                                                    | • Increased awareness of utility                                  | • Count                                                                 |
| Increased understanding of differences between current practice and new approach | <u>11) Comparison of behaviour</u><br>• Modelling of behaviour      | Videos of patient consults integrating FREE in workshop and on website                                           | • Confidence in ability to use FREE<br>• Confidence to manage LBP | • (GP interviews implementation study)<br>• Confidence to manage LBP    |
| Increased confidence in FREE                                                     | <u>13) Comparison of outcomes</u><br>• Persuasive argument          | Information from credible source (University of Otago)                                                           | • Confidence in ability to use FREE<br>• Confidence to manage LBP | • (GP interviews implementation study)<br>• Confidence to manage LBP    |
| Increased understanding of the back and back pain                                | <u>15) Shaping knowledge</u><br>• Antecedents                       | Information about influences (or lack thereof) on back pain and behaviours/ factors which influence outcome      | • Knowledge<br><br>• Clinical behaviour                           | • Back-Pain Attitudes Questionnaire<br>• Clinical behaviour - vignettes |
| Positive experiences of using the approach                                       | <u>15) Shaping knowledge</u><br>• Behavioural experiment            | • Try these five questions<br>• Try these repeated movements                                                     | • Questions asked<br>• Movements repeated                         | • Audio recordings of consult                                           |
| Confident to use approach with patients                                          | <u>15) Shaping knowledge</u><br>• Instruction how to perform        | • Videos of patient consults integrating FREE in workshop<br>• Role plays in workshop<br>• Specific instructions | • Confidence in ability to use FREE<br>• Confidence to manage LBP | • (GP interviews implementation study)<br>• Confidence to manage LBP    |

Note: some behaviour change techniques will be assessed through qualitative interviews performed as part of a parallel implementation study.

\* The numbers in this list relate to the behaviour change techniques included (and their reference numbers) from Michie et al.'s Behaviour Change Technique Taxonomy (v1) of 93 Hierarchically Clustered Techniques based on international consensus.[1]

1. Michie S, Richardson M, Johnston M, Abraham C, Francis J, Hardeman W, Eccles MP, Cane J, Wood CE: The behavior change technique taxonomy (v1) of 93 hierarchically clustered techniques: building an international consensus for the reporting of behavior change interventions. *Ann Behav Med* 2013, 46(1):81-95.
