# Supplementary material for: The Fear Reduction Exercised Early (FREE) approach to low back pain: study protocol for a randomised controlled trial
Source: Springer Nature journal article supplement (doi:10.1186/s13063-017-2225-8), 2017-10-17
Supplement: MOESM3 [file 15141112]

## Additional File 3. Patient behaviour change goals, techniques and assessment

These techniques are described using the behaviour change technique taxonomy developed by Michie et al. [1].

| GOAL                                                                                                                                                                   | BEHAVIOUR CHANGE TECHNIQUE*[1]                                                                                  | MODE OF DELIVERY                                                                                           | MEASURE                                                                                                                                                            | MEASUREMENT TOOL                                                                                                                                                                                                              |
|------------------------------------------------------------------------------------------------------------------------------------------------------------------------|-----------------------------------------------------------------------------------------------------------------|------------------------------------------------------------------------------------------------------------|--------------------------------------------------------------------------------------------------------------------------------------------------------------------|-------------------------------------------------------------------------------------------------------------------------------------------------------------------------------------------------------------------------------|
| <ul style="list-style-type: none"> <li>• Increase movement</li> <li>• Decrease protection</li> <li>• Improve outcome expectation</li> </ul>                            | <u>2) Reward and threat</u> <ul style="list-style-type: none"> <li>• Anticipation of future rewards</li> </ul>  | Information – if you move more and fear less you will be more likely to recover                            | <ul style="list-style-type: none"> <li>• Activity levels</li> <li>• Work participation</li> <li>• Fear avoidance beliefs</li> <li>• Outcome expectation</li> </ul> | <ul style="list-style-type: none"> <li>• (patient interviews - implementation study)</li> <li>• Self-reported days off work</li> <li>• Fear avoidance items</li> <li>• Expectation items</li> </ul>                           |
| <ul style="list-style-type: none"> <li>• Increase movement</li> <li>• Decrease fear of movement</li> </ul>                                                             | <u>3) Repetition and substitution</u> <ul style="list-style-type: none"> <li>• Behavioural rehearsal</li> </ul> | Repeated movements                                                                                         | <ul style="list-style-type: none"> <li>• How often movements are performed</li> <li>• Fear avoidance beliefs</li> </ul>                                            | <ul style="list-style-type: none"> <li>• (patient interviews - implementation study)</li> <li>• Fear avoidance items</li> </ul>                                                                                               |
| <ul style="list-style-type: none"> <li>• Remember to perform repeated movements</li> </ul>                                                                             | <u>5) Associations</u> <ul style="list-style-type: none"> <li>• Prompt</li> </ul>                               | Tear out sheet in patient information booklet                                                              | <ul style="list-style-type: none"> <li>• How often movements are performed</li> </ul>                                                                              | <ul style="list-style-type: none"> <li>• (patient interviews - implementation study)</li> </ul>                                                                                                                               |
| <ul style="list-style-type: none"> <li>• Increase movement</li> <li>• Decrease fear of movement</li> <li>• Reduce threat associated with LBP</li> </ul>                | <u>7) Natural consequences</u> <ul style="list-style-type: none"> <li>• Health consequences</li> </ul>          | Information – risks and benefits of activity; pain education; recovery behaviours                          | <ul style="list-style-type: none"> <li>• Activity levels</li> <li>• Fear avoidance beliefs</li> <li>• Reduced catastrophisation</li> </ul>                         | <ul style="list-style-type: none"> <li>• (patient interviews - implementation study)</li> <li>• Pain self-efficacy items</li> <li>• Fear avoidance items</li> <li>• Catastrophisation item</li> <li>• Anxiety item</li> </ul> |
| <ul style="list-style-type: none"> <li>• Increased support from family and employer</li> </ul>                                                                         | <u>7) Social support</u> <ul style="list-style-type: none"> <li>• Practical and emotional</li> </ul>            | Tear out information sheets for families and employers                                                     | <ul style="list-style-type: none"> <li>• Support received</li> </ul>                                                                                               | <ul style="list-style-type: none"> <li>• (patient interviews - implementation study)</li> </ul>                                                                                                                               |
| <ul style="list-style-type: none"> <li>• Confidence in the FREE approach</li> <li>• Confidence in the GP</li> </ul>                                                    | <u>13) Comparison of outcomes</u> <ul style="list-style-type: none"> <li>• Persuasive argument</li> </ul>       | Information from credible source (University of Otago, GP)<br>Profiling role and ability of GP             | <ul style="list-style-type: none"> <li>• Satisfaction</li> </ul>                                                                                                   | <ul style="list-style-type: none"> <li>• (patient interviews - implementation study)</li> <li>• Satisfaction with information received and care received</li> </ul>                                                           |
| <ul style="list-style-type: none"> <li>• Improve understanding of the back and back pain (resulting in decreased threat and fear, and improved expectation)</li> </ul> | <u>15) Shaping knowledge</u> <ul style="list-style-type: none"> <li>• Antecedents</li> </ul>                    | Information about influences (or lack thereof) on back pain and behaviours/factors which influence outcome | <ul style="list-style-type: none"> <li>• Knowledge</li> </ul>                                                                                                      | <ul style="list-style-type: none"> <li>• Pain self-efficacy items</li> <li>• Fear avoidance items</li> <li>• Catastrophisation item</li> <li>• Anxiety item</li> <li>• Expectation items</li> </ul>                           |
| <ul style="list-style-type: none"> <li>• Decrease fear of movement</li> </ul>                                                                                          | <u>15) Shaping knowledge</u> <ul style="list-style-type: none"> <li>• Behavioural experiment</li> </ul>         | Repeated movements with GP                                                                                 | <ul style="list-style-type: none"> <li>• Activity levels</li> <li>• Fear avoidance beliefs</li> </ul>                                                              | <ul style="list-style-type: none"> <li>• (patient interviews - implementation study)</li> <li>• Pain self-efficacy items</li> <li>• Fear avoidance items</li> </ul>                                                           |
| <ul style="list-style-type: none"> <li>• Increase movement</li> </ul>                                                                                                  | <u>15) Shaping knowledge</u> <ul style="list-style-type: none"> <li>• Instruction how to</li> </ul>             | Exercises to get you started                                                                               | <ul style="list-style-type: none"> <li>• Engage in exercises</li> </ul>                                                                                            | <ul style="list-style-type: none"> <li>• (patient interviews - implementation study)</li> </ul>                                                                                                                               |

| GOAL | BEHAVIOUR CHANGE TECHNIQUE*[1] | MODE OF DELIVERY | MEASURE | MEASUREMENT TOOL |
|------|--------------------------------|------------------|---------|------------------|
|      | perform                        |                  |         |                  |

Note: some behaviour change techniques will be assessed through qualitative interviews performed as part of a parallel implementation study.

\* The numbers in this list relate to the behaviour change techniques included (and their reference numbers) from Michie et al.'s Behaviour Change Technique Taxonomy (v1) of 93 Hierarchically Clustered Techniques based on international consensus.[1]

1. Michie S, Richardson M, Johnston M, Abraham C, Francis J, Hardeman W, Eccles MP, Cane J, Wood CE: The behavior change technique taxonomy (v1) of 93 hierarchically clustered techniques: building an international consensus for the reporting of behavior change interventions. *Ann Behav Med* 2013, 46(1):81-95.

From: Darlow B, Stanley J, Dean S, Abbott JH, Garrett S, Mathieson F, Dowell A (2017). The Fear Reduction Exercised Early (FREE) approach to low back pain: protocol for a cluster randomised, parallel-group, superiority trial of patient impairment 6-months post general practitioner consultation.
