# Supplementary material for: The Fear Reduction Exercised Early (FREE) approach to low back pain: study protocol for a randomised controlled trial
Source: Springer Nature journal article supplement (doi:10.1186/s13063-017-2225-8), 2017-10-17
Supplement: MOESM5 [file 15141112]

## Appendix 5. GP related measures

| TYPE    | DOMAIN                                   | INSTRUMENT                                                                                                                                                                                                                                                                                                                                                                                                                                                                                                                                                                                      | DATA COLLECTION TIME POINTS                       |
|---------|------------------------------------------|-------------------------------------------------------------------------------------------------------------------------------------------------------------------------------------------------------------------------------------------------------------------------------------------------------------------------------------------------------------------------------------------------------------------------------------------------------------------------------------------------------------------------------------------------------------------------------------------------|---------------------------------------------------|
| Outcome | Relationship between pain and impairment | Health Care providers' Pain and Impairment Relationship Scale (HC-PAIRS) [1, 2]<br><br>13 item scale. Each item is scored on a 7-point Likert Scale ranging from 'Completely Disagree' (1 point) to 'Completely Agree' (7 points), resulting in a possible range from 13 to 91 points; higher scores reflect a stronger belief that pain justifies disability and activity limitation.                                                                                                                                                                                                          | -2w*, 4w, 4m                                      |
|         | Confidence                               | Self-confidence in managing back pain patients [3]<br>Four items<br><ol style="list-style-type: none"> <li>1. I lack the diagnostic tools or knowledge needed to effectively assess patients with LBP*</li> <li>2. I know exactly what to do to effectively treat patients with LBP</li> <li>3. I am very comfortable treating patients with LBP.</li> <li>4. How well prepared to manage LBP are you now?</li> </ol><br>All rated on five point Likert scale where 1 = strongly agree and 5 = strongly disagree, except item 4 where 1 = very well and 5 = very poorly<br>* item 1 is reversed | -2w*, 4w, 4m                                      |
|         | Reported clinical behaviour              | Clinical case vignettes of patient with non-specific LBP with three items related to work, physical activity advice [4]<br><br>Categorical outcome with five response options                                                                                                                                                                                                                                                                                                                                                                                                                   | -2w*, 4w, 4m                                      |
|         | Actual clinical behaviour                | Electronic Medical Record notes audit (include investigation referral)<br><br>Consult Record Form                                                                                                                                                                                                                                                                                                                                                                                                                                                                                               | Post each consult with patient participant        |
|         |                                          | Patient report immediately post appointment<br>Did your doctor recommend or advise any of the following? (yes or no) <ul style="list-style-type: none"> <li>• Time off work</li> <li>• Reduced hours at work</li> <li>• Medication</li> <li>• Physiotherapy/Osteopathy/Chiropractic</li> <li>• Specialist</li> <li>• X-rays or scans</li> <li>• Blood tests</li> </ul>                                                                                                                                                                                                                          | Post each consult with patient participant        |
|         |                                          | Items from modified Otago Costs and Consequences Questionnaire (OCC-Q) [5] <ul style="list-style-type: none"> <li>• Medication consumption</li> <li>• Healthcare consumption</li> </ul>                                                                                                                                                                                                                                                                                                                                                                                                         | Gathered from patient participants at 2w, 3m, 6m† |
| Process | Treatment fidelity                       | Audio recordings – 1 recording randomly selected from each GP with audio available<br><br>Consult Audio Record Checklist                                                                                                                                                                                                                                                                                                                                                                                                                                                                        | Post each consult with patient participant        |

| TYPE                     | DOMAIN                                       | INSTRUMENT                                                                                                                                                                                                                                                                                                                                  | DATA COLLECTION TIME POINTS                                             |
|--------------------------|----------------------------------------------|---------------------------------------------------------------------------------------------------------------------------------------------------------------------------------------------------------------------------------------------------------------------------------------------------------------------------------------------|-------------------------------------------------------------------------|
|                          | Consultation duration                        | Audio recordings of all consults assessed for <ol style="list-style-type: none"> <li>1. Total consultation length</li> <li>2. Back pain primary complaint addressed during consultation</li> </ol>                                                                                                                                          | Post each consult with patient participant                              |
|                          | Satisfaction with training                   | Workshop evaluation form                                                                                                                                                                                                                                                                                                                    | 0, (immediately after workshop - intervention group only)               |
|                          | Learning                                     | Back Pain Attitudes Questionnaire (Back-PAQ) [6]<br>34 item scale based upon six themes. Each item is scored on a 5-point Likert scale ranging from 'True' (1 point) to 'False' (5 points), resulting in a possible range from 34 to 170 points; higher scores indicate more unhelpful beliefs, lower scores indicate more helpful beliefs. | -2w, 4w, 4m                                                             |
|                          | Experiential learning                        | GP will record <ol style="list-style-type: none"> <li>1. The number of FREE consultations they conduct during the training period</li> <li>2. The elements of FREE they use in the first three of these consultations</li> <li>3. Their perceptions of the first three of these consultations</li> </ol>                                    | 0 to 4w (during experiential learning period - intervention group only) |
| Demographic              | Gender, age, ethnicity, history of back pain |                                                                                                                                                                                                                                                                                                                                             | -2w*                                                                    |
| Practice characteristics | Years' experience, locality of practice      |                                                                                                                                                                                                                                                                                                                                             | -2w*                                                                    |

\* Measure completed before attending initial workshop (for intervention practices) or matched timing for those in paired control group practice.

† Timing relates to patient participant timeline

## References

1. Rainville J, Carlson N, Polatin P, Gatchel RJ, Indahl A, Volinn E: Exploration of physicians' recommendations for activities in chronic low back pain. *Spine* 2000, 25(17):2210-2220.
2. Sieben JM, Vlaeyen JW, Portegijs PJ, Warmenhoven FC, Sint AG, Dautzenberg N, Romeijnders A, Arntz A, Knottnerus JA: General practitioners' treatment orientations towards low back pain: influence on treatment behaviour and patient outcome. *Eur J Pain* 2009, 13(4):412-418.
3. Smucker DR, Konrad TR, Curtis P, Carey TS: Practitioner self-confidence and patient outcomes in acute low back pain. *Arch Fam Med* 1998, 7(3):223.
4. Evans DW, Foster NE, Underwood M, Vogel S, Breen AC, Pincus T: Testing the effectiveness of an innovative information package on practitioner reported behaviour and beliefs: The UK Chiropractors, Osteopaths and Musculoskeletal Physiotherapists Low back pain Management (COMPLeMENT) trial [ISRCTN77245761]. *BMC Musculoskelet Disord* 2005, 6(41).
5. Pinto D, Robertson MC, Hansen P, Abbott JH: Good agreement between questionnaire and administrative databases for health care use and costs in patients with osteoarthritis. *BMC Med Res Methodol* 2011, 11:45.
6. Darlow B, Perry M, Mathieson F, Stanley J, Melloh M, Marsh R, Baxter GD, Dowell A: The development and exploratory analysis of the Back Pain Attitudes Questionnaire (Back-PAQ). *BMJ Open* 2014, 4(5).

From: Darlow B, Stanley J, Dean S, Abbott JH, Garrett S, Mathieson F, Dowell A (2017). The Fear Reduction Exercised Early (FREE) approach to low back pain: protocol for a cluster randomised, parallel-group, superiority trial of patient impairment 6-months post general practitioner consultation.
